# Supplementary material
Source: PubMed Central journal article supplement (PMC4134960)

# Supplementary Figure 1

**A**

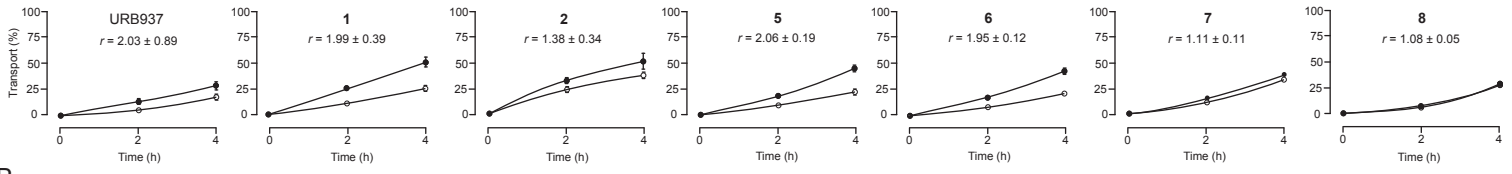

**B**

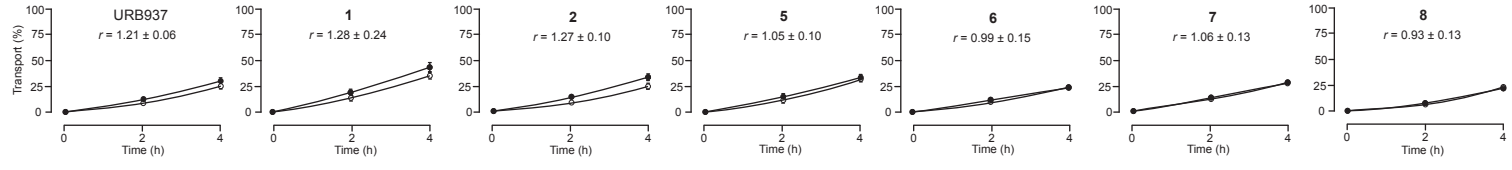

Supplement: NIHMS611075-supplement-02.pdf [file NIHMS611075-supplement-02.pdf]

# Supplementary Figure 2

**A**

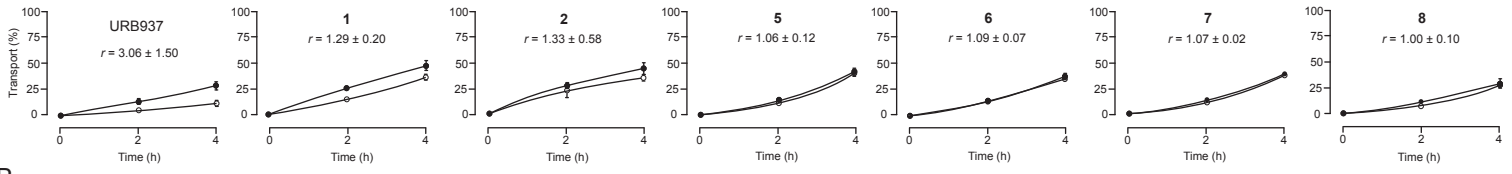

**B**

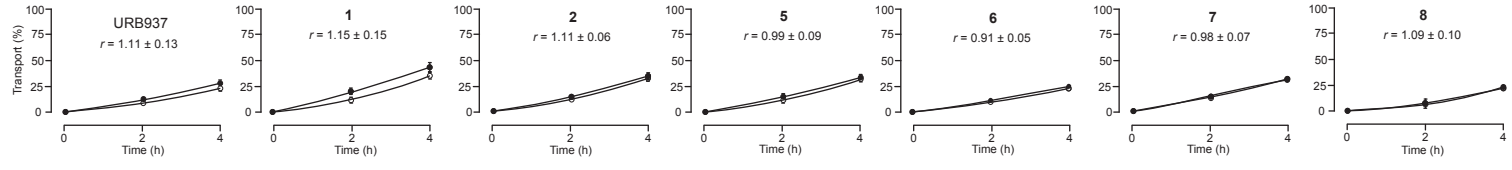

Supplement: NIHMS611075-supplement-03.pdf [file NIHMS611075-supplement-03.pdf]

Supplementary Figure 3

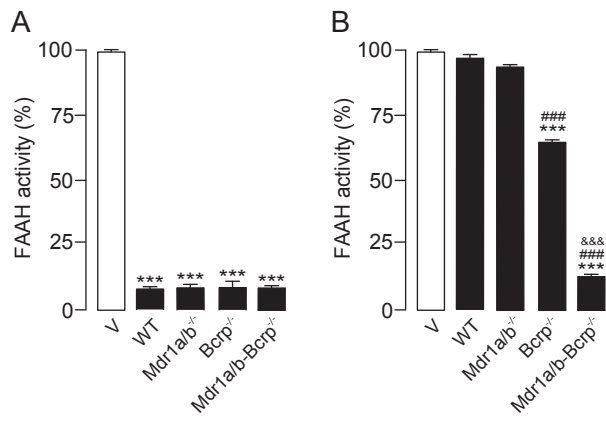

Supplement: NIHMS611075-supplement-04.pdf [file NIHMS611075-supplement-04.pdf]
